# Supplementary material
Source: publisher figshare collection journal article supplement (https://sage.figshare.com/ndownloader/files/15254207)
Supplement: Supplementary file 1 [file 15254207]

Appendix 1. Across-informant estimated correlations among latent variables in a Confirmatory Factor Analysis model for all versions of the Conners 3 scales.

| Scale                              | Parent – Self-Report | Teacher – Self-Report | Parent – Teacher    |
|------------------------------------|----------------------|-----------------------|---------------------|
| Inattention                        | $r = .46, p < .001$  | $r = .30, p < .001$   | $r = .45, p < .001$ |
| Hyperactivity/Impulsivity          | $r = .40, p < .001$  | $r = .29, p < .001$   | $r = .35, p < .001$ |
| Learning Problems <sup>1</sup>     | $r = .69, p < .001$  | $r = .49, p < .001$   | $r = .56, p < .001$ |
| Executive Functioning <sup>1</sup> | -                    | -                     | $r = .41, p < .001$ |
| Defiance/Aggression                | $r = .12, p = .048$  | $r = .16, p = .041$   | $r = .26, p = .003$ |
| Peer Relations                     | -                    | -                     | $r = .34, p < .001$ |

<sup>1</sup> Conners 3-T Learning Problems/Executive Functioning scale is correlated with the Conners 3-P Learning Problems and the Executive Functioning scales and with the Conners 3-SR Learning Problems scale.

The Family Relations Content scale is not reported, as it is present only in the Self-Report version.
